# Supplementary material for: Human-like hyperplastic prostate with low ZIP1 induced solely by Zn deficiency in rats
Source: PubMed Central journal article supplement — Proc Natl Acad Sci U S A. 2018 Nov 5;115(47):E11091–100. doi: 10.1073/pnas.1813956115 (PMC6255182; doi:10.1073/pnas.1813956115), 2018-11-05
Supplement: pnas.1813956115.sapp.pdf [file pnas.1813956115.sapp.pdf]

Supplemental Information - Supplementary Tables S1-S7

**Table S1. Prostate microRNA expression profiling in Zn-deficient middle-aged (11-mo-old) vs Zn-deficient young-adult (2.5-mo-old) rats (Sprague-Dawley strain) using the nanoString™ nCounter rat miRNA expression assay kit (cut off:  $P < 0.05$ , fold-change  $\geq 1.4$ ; n = 6 rats/group)**

| miRNA name                        | Lateral prostate                          |                          | Fold-change | P-value  | *Similarly up- or downregulated in human PCa | References |
|-----------------------------------|-------------------------------------------|--------------------------|-------------|----------|----------------------------------------------|------------|
|                                   | (Average counts $\pm$ standard deviation) |                          |             |          |                                              |            |
|                                   | Zn-deficient middle-aged                  | Zn-deficient young-adult |             |          |                                              |            |
| <b>36 upregulated</b>             |                                           |                          |             |          |                                              |            |
| miR-290 (human ortholog *miR-373) | 968 $\pm$ 229                             | 99 $\pm$ 112             | <b>9.79</b> | 0.000008 | upregulated                                  | (1)        |
| miR-29b                           | 2697 $\pm$ 717                            | 835 $\pm$ 362            | <b>3.23</b> | 0.000204 |                                              |            |
| *miR-200c                         | 1687 $\pm$ 373                            | 622 $\pm$ 192            | <b>2.71</b> | 0.000099 | upregulated                                  | (2, 3)     |
| *miR-21                           | 6173 $\pm$ 3255                           | 2317 $\pm$ 718           | <b>2.66</b> | 0.032911 | upregulated                                  | (4)        |
| *miR-22                           | 2135 $\pm$ 312                            | 882 $\pm$ 184            | <b>2.42</b> | 0.000007 | upregulated                                  | (5)        |
| *miR-141                          | 1258 $\pm$ 85                             | 523 $\pm$ 150            | <b>2.41</b> | 0.000001 | upregulated                                  | (6)        |
| <b>*# miR-96</b>                  | 942 $\pm$ 173                             | 396 $\pm$ 173            | <b>2.38</b> | 0.000278 | upregulated                                  | (7, 8)     |
| *miR-375                          | 540 $\pm$ 179                             | 230 $\pm$ 38             | <b>2.35</b> | 0.007368 | upregulated                                  | (2, 7, 8)  |
| *miR-200b                         | 3859 $\pm$ 484                            | 1704 $\pm$ 475           | <b>2.26</b> | 0.000015 | upregulated                                  | (3)        |
| miR-29c                           | 4043 $\pm$ 860                            | 1793 $\pm$ 441           | <b>2.25</b> | 0.000198 | -                                            |            |
| *miR-200a                         | 11819 $\pm$ 3004                          | 5265 $\pm$ 2025          | <b>2.24</b> | 0.001272 | upregulated                                  | (9)        |
| miR-672                           | 48 $\pm$ 12                               | 21 $\pm$ 7               | <b>2.24</b> | 0.00101  | -                                            |            |
| miR-741-3p                        | 61 $\pm$ 23                               | 29 $\pm$ 11              | <b>2.12</b> | 0.010257 | -                                            |            |
| miR-148b-3p                       | 273 $\pm$ 61                              | 133 $\pm$ 53             | <b>2.05</b> | 0.001756 | -                                            |            |
| miR-30b-5p                        | 1065 $\pm$ 251                            | 535 $\pm$ 282            | <b>1.99</b> | 0.006358 | -                                            |            |
| miR-146a                          | 313 $\pm$ 59                              | 162 $\pm$ 41             | <b>1.93</b> | 0.000466 | -                                            |            |
| miR-429                           | 3335 $\pm$ 410                            | 1794 $\pm$ 364           | <b>1.86</b> | 0.000043 | -                                            |            |
| miR-1224                          | 53 $\pm$ 12                               | 29 $\pm$ 7               | <b>1.85</b> | 0.001685 | -                                            |            |
| <b>*# miR-182</b>                 | 34 $\pm$ 12                               | 20 $\pm$ 8               | <b>1.73</b> | 0.029198 | upregulated                                  | (2, 7, 8)  |
| miR-34a                           | 48 $\pm$ 11                               | 28 $\pm$ 6               | <b>1.72</b> | 0.003222 | -                                            |            |
| *miR-30d                          | 1214 $\pm$ 183                            | 705 $\pm$ 172            | <b>1.72</b> | 0.000561 | upregulated                                  | (10)       |
| miR-653                           | 11 $\pm$ 3                                | 7 $\pm$ 2                | <b>1.63</b> | 0.019231 | -                                            |            |
| miR-142-3p                        | 401 $\pm$ 106                             | 247 $\pm$ 40             | <b>1.62</b> | 0.007488 | -                                            |            |
| miR-29a                           | 8494 $\pm$ 1324                           | 5236 $\pm$ 1059          | <b>1.62</b> | 0.000834 | -                                            |            |
| miR-101a                          | 208 $\pm$ 29                              | 130 $\pm$ 23             | <b>1.6</b>  | 0.000415 | -                                            |            |
| miR-448                           | 31 $\pm$ 3                                | 20 $\pm$ 9               | <b>1.58</b> | 0.0287   | -                                            |            |
| *miR-222                          | 49 $\pm$ 15                               | 31 $\pm$ 6               | <b>1.57</b> | 0.021055 | upregulated                                  | (11)       |

|                         |            |            |              |          |               |        |
|-------------------------|------------|------------|--------------|----------|---------------|--------|
| miR-365                 | 259 ± 64   | 166 ± 54   | <b>1.56</b>  | 0.020649 | -             |        |
| miR-152                 | 726 ± 182  | 465 ± 99   | <b>1.56</b>  | 0.011547 | -             |        |
| miR-425                 | 58 ± 5     | 39 ± 13    | <b>1.51</b>  | 0.00643  | -             |        |
| let-7b                  | 5125 ± 334 | 3536 ± 497 | <b>1.45</b>  | 0.000069 | -             |        |
| let-7a                  | 3446 ± 332 | 2383 ± 449 | <b>1.45</b>  | 0.000885 | -             |        |
| miR-511                 | 46 ± 7     | 32 ± 7     | <b>1.42</b>  | 0.006396 | -             |        |
| miR-223                 | 46 ± 10    | 32 ± 6     | <b>1.41</b>  | 0.015748 | -             |        |
| *miR-32                 | 88 ± 2     | 63 ± 10    | <b>1.41</b>  | 0.001042 | upregulated   | (2)    |
| <b>*# miR-183</b>       | 96 ± 11    | 68 ± 16    | <b>1.41</b>  | 0.005506 | upregulated   | (7, 8) |
| <b>29 downregulated</b> |            |            |              |          |               |        |
| miR-127                 | 33 ± 19    | 168 ± 119  | <b>-5</b>    | 0.038745 | -             |        |
| *miR-495                | 17 ± 8     | 56 ± 33    | <b>-3.23</b> | 0.032971 | downregulated | (12)   |
| miR-433                 | 13 ± 2     | 36 ± 18    | <b>-2.86</b> | 0.025546 | -             |        |
| miR-181c                | 22 ± 4     | 52 ± 15    | <b>-2.38</b> | 0.004144 | -             |        |
| miR-411                 | 17 ± 5     | 39 ± 10    | <b>-2.27</b> | 0.000658 | -             |        |
| miR-431                 | 13 ± 3     | 29 ± 11    | <b>-2.22</b> | 0.015275 | -             |        |
| miR-134                 | 19 ± 7     | 35 ± 7     | <b>-1.89</b> | 0.002102 | -             |        |
| miR-369-5p              | 14 ± 3     | 26 ± 6     | <b>-1.85</b> | 0.001239 | -             |        |
| miR-300-3p              | 11 ± 5     | 20 ± 6     | <b>-1.82</b> | 0.023012 | -             |        |
| *miR-199a-3p            | 874 ± 310  | 1603 ± 571 | <b>-1.82</b> | 0.020597 | downregulated | (13)   |
| *miR-132                | 24 ± 4     | 43 ± 14    | <b>-1.79</b> | 0.0186   | downregulated | (14)   |
| miR-199a-5p             | 513 ± 166  | 901 ± 233  | <b>-1.75</b> | 0.007737 | -             |        |
| *miR-376c               | 27 ± 9     | 47 ± 16    | <b>-1.72</b> | 0.025688 | downregulated | (12)   |
| *miR-100                | 219 ± 60   | 363 ± 55   | <b>-1.67</b> | 0.001511 | downregulated | (15)   |
| miR-326                 | 32 ± 10    | 53 ± 9     | <b>-1.67</b> | 0.003441 | -             |        |
| miR-873                 | 8 ± 2      | 13 ± 3     | <b>-1.59</b> | 0.012127 | -             |        |
| miR-181a                | 539 ± 228  | 852 ± 133  | <b>-1.59</b> | 0.01573  | -             |        |
| miR-25                  | 424 ± 47   | 673 ± 166  | <b>-1.59</b> | 0.013094 | -             |        |
| miR-539                 | 37 ± 7     | 59 ± 16    | <b>-1.59</b> | 0.014177 | -             |        |
| miR-328a                | 38 ± 7     | 59 ± 15    | <b>-1.56</b> | 0.011051 | -             |        |
| *miR-17-5p              | 108 ± 24   | 168 ± 45   | <b>-1.56</b> | 0.015873 | downregulated | (4)    |
| *miR-130a               | 343 ± 99   | 526 ± 70   | <b>-1.54</b> | 0.004178 | downregulated | (16)   |
| miR-379                 | 15 ± 4     | 23 ± 6     | <b>-1.54</b> | 0.024061 | -             |        |
| miR-874                 | 10 ± 3     | 15 ± 3     | <b>-1.47</b> | 0.015069 | -             |        |
| miR-301a                | 45 ± 10    | 66 ± 15    | <b>-1.45</b> | 0.021539 | -             |        |
| miR-153                 | 19 ± 6     | 28 ± 5     | <b>-1.45</b> | 0.023759 | -             |        |
| *miR-409-3p             | 15 ± 2     | 21 ± 4     | <b>-1.45</b> | 0.002277 | downregulated | (17)   |
| *miR-27b                | 1852 ± 461 | 2630 ± 478 | <b>-1.43</b> | 0.016723 | downregulated | (18)   |
| miR-342-3p              | 53 ± 14    | 74 ± 11    | <b>-1.41</b> | 0.016961 | -             |        |

\*# denotes the entire miR-183-96-182 cluster that is overexpressed in human prostate cancer and regulates Zn-homeostasis is upregulated in Zn-deficient vs Zn-sufficient middle-aged rat prostate

**Table S2. Prostate microRNA expression profiling in Zn-sufficient middle-aged (11-mo-old) vs Zn-sufficient young adult (2.5-mo-old) rats (Sprague-Dawley strain) using the nanoString™ nCounter rat miRNA expression assay kit (cut off:  $P < 0.05$ , fold-change  $\geq 1.4$ ; n = 6 rats/group)**

| miRNA name                        | Lateral prostate                          |                           | Fold-change | P-value  | *Similarly up- or downregulated in human PCa | References |
|-----------------------------------|-------------------------------------------|---------------------------|-------------|----------|----------------------------------------------|------------|
|                                   | (Average counts $\pm$ standard deviation) |                           |             |          |                                              |            |
|                                   | Zn-Sufficient middle-aged                 | Zn-Sufficient young-adult |             |          |                                              |            |
| <b>38 upregulated</b>             |                                           |                           |             |          |                                              |            |
| miR-290 (human ortholog *miR-373) | 638 $\pm$ 226                             | 103 $\pm$ 75              | <b>6.17</b> | 0.001455 | upregulated                                  | (1)        |
| *miR-200a                         | 11573 $\pm$ 1820                          | 3928 $\pm$ 1071           | <b>2.95</b> | 0.000005 | upregulated                                  | (9)        |
| *miR-200c                         | 1590 $\pm$ 226                            | 584 $\pm$ 120             | <b>2.72</b> | 0.000002 | upregulated                                  | (2, 3)     |
| miR-29b                           | 2142 $\pm$ 314                            | 869 $\pm$ 94              | <b>2.46</b> | 0.000087 | -                                            |            |
| *miR-141                          | 1118 $\pm$ 187                            | 485 $\pm$ 45              | <b>2.31</b> | 0.000279 | upregulated                                  | (6)        |
| *miR-375                          | 562 $\pm$ 98                              | 245 $\pm$ 58              | <b>2.3</b>  | 0.000045 | upregulated                                  | (2, 7, 8)  |
| *miR-200b                         | 3798 $\pm$ 504                            | 1786 $\pm$ 388            | <b>2.13</b> | 0.000016 | upregulated                                  | (3)        |
| miR-672                           | 54 $\pm$ 15                               | 26 $\pm$ 4                | <b>2.10</b> | 0.00506  | -                                            |            |
| miR-3564                          | 20 $\pm$ 3                                | 10 $\pm$ 4                | <b>2.00</b> | 0.000496 | -                                            |            |
| miR-29c                           | 3406 $\pm$ 559                            | 1725 $\pm$ 245            | <b>1.97</b> | 0.000051 | -                                            |            |
| miR-30b-5p                        | 889 $\pm$ 188                             | 460 $\pm$ 94              | <b>1.93</b> | 0.000539 | -                                            |            |
| *miR-144                          | 70 $\pm$ 26                               | 39 $\pm$ 10               | <b>1.82</b> | 0.018764 | upregulated                                  | (1)        |
| miR-291b                          | 15 $\pm$ 6                                | 8 $\pm$ 3                 | <b>1.81</b> | 0.029774 | -                                            |            |
| <b>*miR-96</b>                    | 792 $\pm$ 93                              | 443 $\pm$ 122             | <b>1.79</b> | 0.000239 | upregulated                                  | (7)        |
| *miR-30d                          | 1094 $\pm$ 241                            | 617 $\pm$ 70              | <b>1.77</b> | 0.003763 | upregulated                                  | (10)       |
| miR-148b-3p                       | 256 $\pm$ 39                              | 150 $\pm$ 32              | <b>1.70</b> | 0.000398 | -                                            |            |
| miR-292-3p                        | 18 $\pm$ 6                                | 11 $\pm$ 4                | <b>1.59</b> | 0.035223 | -                                            |            |
| miR-30e                           | 206 $\pm$ 50                              | 129 $\pm$ 21              | <b>1.59</b> | 0.005951 | -                                            |            |
| miR-34a                           | 41 $\pm$ 4                                | 26 $\pm$ 4                | <b>1.57</b> | 0.000092 | -                                            |            |
| miR-511                           | 48 $\pm$ 10                               | 31 $\pm$ 2                | <b>1.56</b> | 0.007412 | -                                            |            |
| miR-207                           | 13 $\pm$ 3                                | 8 $\pm$ 2                 | <b>1.54</b> | 0.007199 | -                                            |            |
| miR-298                           | 21 $\pm$ 3                                | 14 $\pm$ 2                | <b>1.54</b> | 0.000971 | -                                            |            |
| miR-3578                          | 58 $\pm$ 18                               | 38 $\pm$ 9                | <b>1.53</b> | 0.030298 | -                                            |            |
| miR-190b                          | 24 $\pm$ 8                                | 16 $\pm$ 5                | <b>1.51</b> | 0.044389 | -                                            |            |
| miR-201                           | 33 $\pm$ 5                                | 22 $\pm$ 5                | <b>1.49</b> | 0.005412 | -                                            |            |
| *miR-31                           | 28 $\pm$ 7                                | 19 $\pm$ 3                | <b>1.48</b> | 0.014426 | upregulated                                  | (2)        |
| *miR-21                           | 3763 $\pm$ 369                            | 2554 $\pm$ 181            | <b>1.47</b> | 0.000029 | upregulated                                  | (4)        |
| miR-3589                          | 55 $\pm$ 10                               | 37 $\pm$ 7                | <b>1.47</b> | 0.004552 | -                                            |            |
| *miR-222                          | 39 $\pm$ 4                                | 27 $\pm$ 4                | <b>1.47</b> | 0.000349 | upregulated                                  | (11)       |
| *miR-32                           | 80 $\pm$ 13                               | 55 $\pm$ 11               | <b>1.46</b> | 0.00448  | upregulated                                  | (2)        |
| miR-29a                           | 6956 $\pm$ 1253                           | 4775 $\pm$ 485            | <b>1.46</b> | 0.002617 | -                                            |            |
| miR-2964                          | 14 $\pm$ 3                                | 10 $\pm$ 1                | <b>1.45</b> | 0.005915 | -                                            |            |
| miR-3592                          | 30 $\pm$ 8                                | 21 $\pm$ 4                | <b>1.43</b> | 0.030332 | -                                            |            |
| miR-883                           | 15 $\pm$ 3                                | 10 $\pm$ 3                | <b>1.43</b> | 0.041527 | -                                            |            |
| miR-429                           | 2820 $\pm$ 443                            | 1977 $\pm$ 289            | <b>1.43</b> | 0.002927 | -                                            |            |
| miR-3594-3p                       | 74 $\pm$ 6                                | 52 $\pm$ 9                | <b>1.42</b> | 0.000467 | -                                            |            |
| miR-628                           | 86 $\pm$ 17                               | 61 $\pm$ 8                | <b>1.41</b> | 0.008299 | -                                            |            |
| miR-101a                          | 182 $\pm$ 38                              | 130 $\pm$ 32              | <b>1.4</b>  | 0.0298   | -                                            |            |

| <b>46 downregulated</b> |            |            |              |         |               |      |
|-------------------------|------------|------------|--------------|---------|---------------|------|
| miR-376b-3p             | 25 ± 10    | 94 ± 50    | <b>-3.71</b> | 0.01991 | -             |      |
| miR-127                 | 41 ± 22    | 137 ± 81   | <b>-3.38</b> | 0.03212 | -             |      |
| miR-218a                | 86 ± 45    | 285 ± 173  | <b>-3.31</b> | 0.03651 | -             |      |
| miR-369-3p              | 21 ± 9     | 66 ± 29    | <b>-3.09</b> | 0.01077 | -             |      |
| miR-434                 | 44 ± 14    | 130 ± 58   | <b>-2.97</b> | 0.01356 | -             |      |
| *miR-487b               | 13 ± 5     | 37 ± 20    | <b>-2.88</b> | 0.02826 | downregulated | (12) |
| *miR-124                | 27 ± 18    | 72 ± 39    | <b>-2.63</b> | 0.02984 | downregulated | (19) |
| miR-410                 | 24 ± 5     | 57 ± 25    | <b>-2.42</b> | 0.02096 | -             |      |
| *miR-199a-3p            | 829 ± 133  | 1983 ± 314 | <b>-2.39</b> | 0.00001 | downregulated | (13) |
| miR-382                 | 23 ± 10    | 50 ± 26    | <b>-2.18</b> | 0.04019 | -             |      |
| *miR-130a               | 298 ± 63   | 638 ± 105  | <b>-2.14</b> | 0.00005 | downregulated | (16) |
| miR-196a                | 32 ± 7     | 65 ± 25    | <b>-2.03</b> | 0.02259 | -             |      |
| *miR-100                | 210 ± 40   | 416 ± 90   | <b>-1.98</b> | 0.00045 | downregulated | (20) |
| miR-181a                | 431 ± 95   | 848 ± 163  | <b>-1.97</b> | 0.00030 | -             |      |
| miR-411                 | 19 ± 6     | 37 ± 12    | <b>-1.90</b> | 0.00948 | -             |      |
| miR-15b                 | 210 ± 27   | 394 ± 121  | <b>-1.88</b> | 0.01224 | -             |      |
| miR-136                 | 28 ± 7     | 52 ± 21    | <b>-1.87</b> | 0.03728 | -             |      |
| miR-199a-5p             | 466 ± 117  | 857 ± 96   | <b>-1.84</b> | 0.00008 | -             |      |
| miR-450a                | 68 ± 11    | 123 ± 15   | <b>-1.81</b> | 0.00003 | -             |      |
| miR-1949                | 22 ± 8     | 40 ± 13    | <b>-1.79</b> | 0.02032 | -             |      |
| miR-340-5p              | 45 ± 9     | 80 ± 13    | <b>-1.78</b> | 0.00031 | -             |      |
| *miR-495                | 22 ± 7     | 38 ± 15    | <b>-1.77</b> | 0.03376 | downregulated | (12) |
| miR-323                 | 29 ± 8     | 51 ± 13    | <b>-1.77</b> | 0.00521 | -             |      |
| *miR-27b                | 1648 ± 509 | 2907 ± 681 | <b>-1.76</b> | 0.00464 | downregulated | (18) |
| miR-667                 | 11 ± 5     | 19 ± 4     | <b>-1.73</b> | 0.01195 | -             |      |
| *miR-376c               | 27 ± 5     | 47 ± 13    | <b>-1.70</b> | 0.00705 | downregulated | (12) |
| *miR-133a               | 59 ± 7     | 100 ± 22   | <b>-1.69</b> | 0.00488 | downregulated | (21) |
| miR-872                 | 45 ± 7     | 74 ± 10    | <b>-1.66</b> | 0.00015 | -             |      |
| miR-299                 | 8 ± 2      | 13 ± 1     | <b>-1.65</b> | 0.00012 | -             |      |
| *miR-99a                | 1833 ± 303 | 2984 ± 368 | <b>-1.63</b> | 0.00015 | downregulated | (22) |
| miR-301a                | 47 ± 10    | 77 ± 12    | <b>-1.63</b> | 0.00093 | -             |      |
| miR-196c                | 70 ± 16    | 113 ± 35   | <b>-1.61</b> | 0.02193 | -             |      |
| miR-181c                | 28 ± 6     | 44 ± 8     | <b>-1.59</b> | 0.00320 | -             |      |
| miR-326                 | 31 ± 9     | 50 ± 10    | <b>-1.59</b> | 0.00540 | -             |      |
| *miR-181b+miR-181d      | 18 ± 5     | 28 ± 6     | <b>-1.56</b> | 0.01147 | downregulated | (7)  |
| miR-342-3p              | 48 ± 11    | 75 ± 14    | <b>-1.56</b> | 0.00404 | -             |      |
| miR-25                  | 370 ± 46   | 577 ± 100  | <b>-1.56</b> | 0.00097 | -             |      |
| miR-539                 | 37 ± 6     | 57 ± 14    | <b>-1.52</b> | 0.01234 | -             |      |
| miR-337                 | 17 ± 6     | 25 ± 3     | <b>-1.52</b> | 0.00938 | -             |      |
| miR-125a-5p             | 603 ± 61   | 917 ± 181  | <b>-1.52</b> | 0.00661 | -             |      |
| let-7e                  | 319 ± 57   | 466 ± 81   | <b>-1.46</b> | 0.00451 | -             |      |
| *miR-17-5p              | 106 ± 18   | 154 ± 22   | <b>-1.46</b> | 0.00215 | downregulated | (4)  |
| miR-322                 | 83 ± 13    | 118 ± 19   | <b>-1.43</b> | 0.00319 | -             |      |
| miR-27a                 | 447 ± 82   | 632 ± 107  | <b>-1.41</b> | 0.00723 | -             |      |
| miR-9                   | 81 ± 12    | 115 ± 11   | <b>-1.41</b> | 0.00058 | -             |      |
| miR-431                 | 20 ± 3     | 28 ± 7     | <b>-1.41</b> | 0.03986 | -             |      |

**Table S3. Prostate microRNA expression profiling in Zn-deficient adult (5-mo-old) vs Zn-deficient young-adult (2.5-mo-old) rats (Sprague-Dawley strain) using the nanoString™ nCounter rat miRNA expression assay kit (cut off:  $P < 0.05$ , fold-change  $\geq 1.4$ ;  $n = 6$  rats/group)**

| miRNA name                              | Lateral prostate<br>(Average counts $\pm$ standard deviation) |                          | Fold-change | P-value  | *Similarly up-<br>or<br>downregulated in<br>human PCa | References |
|-----------------------------------------|---------------------------------------------------------------|--------------------------|-------------|----------|-------------------------------------------------------|------------|
|                                         | Zn-deficient adult                                            | Zn-deficient young adult |             |          |                                                       |            |
| <b>25 upregulated</b>                   |                                                               |                          |             |          |                                                       |            |
| miR-290<br>(human ortholog<br>*miR-373) | 329 $\pm$ 123                                                 | 99 $\pm$ 112             | 3.33        | 0.006899 | upregulated                                           | (1)        |
| miR-29b                                 | 2000 $\pm$ 496                                                | 835 $\pm$ 362            | 2.39        | 0.000913 | -                                                     |            |
| miR-741-3p                              | 55 $\pm$ 11                                                   | 29 $\pm$ 11              | 1.90        | 0.001919 | -                                                     |            |
| miR-196c                                | 130 $\pm$ 34                                                  | 70 $\pm$ 12              | 1.85        | 0.005661 | -                                                     |            |
| <b>*miR-96</b>                          | 727 $\pm$ 111                                                 | 396 $\pm$ 173            | 1.84        | 0.002734 | upregulated                                           | (7)        |
| *miR-22                                 | 1607 $\pm$ 240                                                | 882 $\pm$ 184            | 1.82        | 0.000154 | upregulated                                           | (5)        |
| miR-148b-3p                             | 241 $\pm$ 36                                                  | 133 $\pm$ 54             | 1.81        | 0.002247 | -                                                     |            |
| miR-7b                                  | 42 $\pm$ 8                                                    | 24 $\pm$ 5               | 1.73        | 0.000953 | -                                                     |            |
| miR-543                                 | 131 $\pm$ 16                                                  | 76 $\pm$ 28              | 1.73        | 0.001996 | -                                                     |            |
| miR-101a                                | 218 $\pm$ 38                                                  | 130 $\pm$ 23             | 1.68        | 0.000637 | -                                                     |            |
| *miR-200c                               | 1038 $\pm$ 215                                                | 622 $\pm$ 192            | 1.67        | 0.005359 | upregulated                                           | (2, 3)     |
| miR-29c                                 | 2952 $\pm$ 747                                                | 1793 $\pm$ 441           | 1.65        | 0.008375 | -                                                     |            |
| miR-142-3p                              | 406 $\pm$ 96                                                  | 247 $\pm$ 40             | 1.64        | 0.003893 | -                                                     |            |
| miR-146a                                | 261 $\pm$ 39                                                  | 161 $\pm$ 42             | 1.61        | 0.001631 | -                                                     |            |
| miR-295                                 | 33 $\pm$ 7                                                    | 22 $\pm$ 7               | 1.56        | 0.022132 | -                                                     |            |
| *miR-21                                 | 3491 $\pm$ 778                                                | 2317 $\pm$ 718           | 1.51        | 0.021716 | upregulated                                           | (4)        |
| miR-30c                                 | 286 $\pm$ 45                                                  | 192 $\pm$ 64             | 1.49        | 0.014592 | -                                                     |            |
| miR-29a                                 | 7743 $\pm$ 1195                                               | 5236 $\pm$ 1059          | 1.48        | 0.003236 | -                                                     | (23)       |
| miR-33                                  | 46 $\pm$ 6                                                    | 31 $\pm$ 4               | 1.46        | 0.000706 | -                                                     |            |
| <b>*miR-183</b>                         | 99 $\pm$ 15                                                   | 68 $\pm$ 16              | 1.45        | 0.006368 | upregulated                                           | (7, 8)     |
| miR-98                                  | 369 $\pm$ 54                                                  | 254 $\pm$ 87             | 1.45        | 0.020334 | -                                                     |            |
| miR-3552                                | 29 $\pm$ 5                                                    | 20 $\pm$ 4               | 1.44        | 0.008956 | -                                                     |            |
| *miR-26a                                | 333 $\pm$ 60                                                  | 233 $\pm$ 45             | 1.43        | 0.008592 | upregulated                                           | (2)        |
| miR-340-5p                              | 86 $\pm$ 20                                                   | 61 $\pm$ 15              | 1.42        | 0.033099 | -                                                     |            |
| let-7a                                  | 3339 $\pm$ 497                                                | 2383 $\pm$ 449           | 1.40        | 0.005742 | -                                                     |            |
| <b>9 downregulated</b>                  |                                                               |                          |             |          |                                                       |            |
| miR-134                                 | 20 $\pm$ 4                                                    | 35 $\pm$ 7               | -1.75       | 0.001072 | -                                                     |            |
| miR-219-5p                              | 12 $\pm$ 3                                                    | 21 $\pm$ 5               | -1.67       | 0.006543 | -                                                     |            |
| miR-3577                                | 14 $\pm$ 3                                                    | 23 $\pm$ 7               | -1.67       | 0.010419 | -                                                     |            |
| miR-541                                 | 14 $\pm$ 3                                                    | 22 $\pm$ 7               | -1.59       | 0.018707 | -                                                     |            |
| miR-539                                 | 38 $\pm$ 12                                                   | 59 $\pm$ 17              | -1.56       | 0.029863 | -                                                     |            |
| miR-181c                                | 34 $\pm$ 10                                                   | 52 $\pm$ 15              | -1.54       | 0.034197 | -                                                     |            |
| *miR-409-3p                             | 14 $\pm$ 5                                                    | 21 $\pm$ 4               | -1.52       | 0.013357 | downregulated                                         | (17)       |
| miR-3561-3p                             | 32 $\pm$ 7                                                    | 45 $\pm$ 11              | -1.43       | 0.032973 | -                                                     |            |
| miR-411                                 | 27 $\pm$ 5                                                    | 39 $\pm$ 10              | -1.43       | 0.026387 | -                                                     |            |

**Table S4. Prostate microRNA expression profiling in Zn-sufficient adult (5-mo-old) and Zn-sufficient young-adult (2.5-mo-old) rats (Sprague-Dawley strain) using the nanoString™ nCounter rat miRNA expression assay kit (cut off:  $P < 0.05$ , fold-change  $\geq 1.4$ ;  $n = 6$  rats/group)**

| miRNA name              | Lateral prostate<br>(Average counts $\pm$ standard deviation) |                           | Fold-change | P-value  | *Similarly up-<br>or<br>downregulated<br>in human PCa | References |
|-------------------------|---------------------------------------------------------------|---------------------------|-------------|----------|-------------------------------------------------------|------------|
|                         | Zn-sufficient adult                                           | Zn-sufficient young-adult |             |          |                                                       |            |
| <b>19 upregulated</b>   |                                                               |                           |             |          |                                                       |            |
| miR-301b                | 23 $\pm$ 5                                                    | 13 $\pm$ 3                | 1.73        | 0.001840 | -                                                     |            |
| miR-139-3p              | 21 $\pm$ 6                                                    | 12 $\pm$ 5                | 1.69        | 0.027444 | -                                                     |            |
| miR-29b                 | 1460 $\pm$ 199                                                | 869 $\pm$ 94              | 1.68        | 0.000062 | -                                                     |            |
| *miR-200c               | 963 $\pm$ 196                                                 | 584 $\pm$ 120             | 1.65        | 0.002391 | upregulated                                           | (2, 3)     |
| miR-449c-5p             | 19 $\pm$ 3                                                    | 12 $\pm$ 2                | 1.64        | 0.000285 | -                                                     |            |
| miR-3577                | 33 $\pm$ 5                                                    | 20 $\pm$ 7                | 1.64        | 0.005812 | -                                                     |            |
| miR-327                 | 27 $\pm$ 7                                                    | 17 $\pm$ 3                | 1.62        | 0.007680 | -                                                     |            |
| miR-29c                 | 2741 $\pm$ 424                                                | 1725 $\pm$ 245            | 1.59        | 0.000478 | -                                                     |            |
| miR-207                 | 13 $\pm$ 4                                                    | 9 $\pm$ 2                 | 1.59        | 0.014644 | -                                                     |            |
| miR-3563-3p             | 26 $\pm$ 5                                                    | 16 $\pm$ 4                | 1.58        | 0.003346 | -                                                     |            |
| miR-347                 | 30 $\pm$ 8                                                    | 19 $\pm$ 9                | 1.58        | 0.039193 | -                                                     |            |
| *miR-375                | 384 $\pm$ 67                                                  | 245 $\pm$ 58              | 1.57        | 0.003205 | upregulated                                           | (2, 7, 8)  |
| miR-3562                | 17 $\pm$ 4                                                    | 11 $\pm$ 1                | 1.55        | 0.006761 | -                                                     |            |
| miR-328b-3p             | 28 $\pm$ 4                                                    | 19 $\pm$ 7                | 1.48        | 0.016967 | -                                                     |            |
| miR-3585-3p             | 27 $\pm$ 5                                                    | 18 $\pm$ 4                | 1.47        | 0.010414 | -                                                     |            |
| miR-298                 | 19 $\pm$ 3                                                    | 14 $\pm$ 2                | 1.44        | 0.002294 | -                                                     |            |
| miR-876                 | 25 $\pm$ 7                                                    | 18 $\pm$ 4                | 1.44        | 0.036926 | -                                                     |            |
| *miR-187                | 38 $\pm$ 7                                                    | 26 $\pm$ 8                | 1.43        | 0.024827 | upregulated                                           | (24)       |
| miR-3575                | 18 $\pm$ 3                                                    | 13 $\pm$ 3                | 1.41        | 0.009606 | -                                                     |            |
| <b>20 downregulated</b> |                                                               |                           |             |          |                                                       |            |
| miR-127                 | 37 $\pm$ 15                                                   | 137 $\pm$ 81              | -3.70       | 0.028938 | -                                                     |            |
| miR-376b-3p             | 30 $\pm$ 9                                                    | 94 $\pm$ 50               | -3.13       | 0.026127 | -                                                     |            |
| *miR-124                | 25 $\pm$ 26                                                   | 72 $\pm$ 39               | -2.86       | 0.035348 | downregulated                                         | (19)       |
| miR-434                 | 55 $\pm$ 30                                                   | 130 $\pm$ 58              | -2.38       | 0.017522 | -                                                     |            |
| *miR-487b               | 17 $\pm$ 8                                                    | 37 $\pm$ 20               | -2.22       | 0.039431 | downregulated                                         | (12)       |
| miR-410                 | 27 $\pm$ 6                                                    | 57 $\pm$ 25               | -2.13       | 0.029732 | -                                                     |            |
| miR-369-3p              | 34 $\pm$ 13                                                   | 66 $\pm$ 29               | -1.92       | 0.032283 | -                                                     |            |
| *miR-376a               | 18 $\pm$ 4                                                    | 33 $\pm$ 11               | -1.82       | 0.021664 | downregulated                                         | (12)       |
| miR-26a                 | 140 $\pm$ 60                                                  | 238 $\pm$ 62              | -1.69       | 0.019105 | -                                                     |            |
| miR-324-5p              | 35 $\pm$ 6                                                    | 58 $\pm$ 12               | -1.67       | 0.001608 | -                                                     |            |
| miR-337                 | 15 $\pm$ 4                                                    | 25 $\pm$ 3                | -1.67       | 0.000416 | -                                                     |            |
| miR-98                  | 189 $\pm$ 52                                                  | 301 $\pm$ 106             | -1.59       | 0.042288 | -                                                     |            |
| miR-543                 | 54 $\pm$ 13                                                   | 85 $\pm$ 29               | -1.56       | 0.037008 | -                                                     |            |

|           |          |          |       |          |               |      |
|-----------|----------|----------|-------|----------|---------------|------|
| *miR-376c | 31 ± 7   | 47 ± 13  | -1.52 | 0.025441 | downregulated | (12) |
| miR-323   | 34 ± 7   | 51 ± 13  | -1.52 | 0.017184 | -             |      |
| miR-129   | 13 ± 2   | 20 ± 6   | -1.52 | 0.030992 | -             |      |
| miR-99b   | 185 ± 42 | 281 ± 58 | -1.52 | 0.008515 | -             |      |
| miR-539   | 37 ± 3   | 57 ± 14  | -1.52 | 0.020555 | -             |      |
| miR-7b    | 21 ± 5   | 30 ± 4   | -1.43 | 0.006742 | -             |      |
| miR-326   | 35 ± 5   | 50 ± 10  | -1.43 | 0.006966 | -             |      |

## References

1. Walter BA, Valera VA, Pinto PAMerino MJ (2013) Comprehensive microRNA Profiling of Prostate Cancer. *J. Cancer* 4(5):350-357.
2. Ambs S, et al. (2008) Genomic profiling of microRNA and messenger RNA reveals deregulated microRNA expression in prostate cancer. *Cancer Res.* 68(15):6162-6170.
3. Hart M, et al. (2014) Comparative microRNA profiling of prostate carcinomas with increasing tumor stage by deep sequencing. *Mol. Cancer Res.* 12(2):250-263.
4. Volinia S, et al. (2006) A microRNA expression signature of human solid tumors defines cancer gene targets. *Proc. Natl. Acad. Sci. U. S. A.* 103(7):2257-2261.
5. Poliseno L, et al. (2010) Identification of the miR-106b~25 microRNA cluster as a proto-oncogenic PTEN-targeting intron that cooperates with its host gene MCM7 in transformation. *Science signaling* 3(117):ra29.
6. Brase JC, et al. (2011) Circulating miRNAs are correlated with tumor progression in prostate cancer. *Int. J. Cancer* 128(3):608-616.
7. Schaefer A, et al. (2010) Diagnostic and prognostic implications of microRNA profiling in prostate carcinoma. *Int. J. Cancer* 126(5):1166-1176.
8. Mihelich BL, et al. (2011) miR-183-96-182 cluster is overexpressed in prostate tissue and regulates zinc homeostasis in prostate cells. *J. Biol. Chem.* 286(52):44503-44511.
9. Barron N, et al. (2012) Biochemical relapse following radical prostatectomy and miR-200a levels in prostate cancer. *Prostate* 72(11):1193-1199.
10. Kobayashi N, et al. (2012) Identification of miR-30d as a novel prognostic maker of prostate cancer. *Oncotarget* 3(11):1455-1471.
11. Galardi S, et al. (2007) miR-221 and miR-222 expression affects the proliferation potential of human prostate carcinoma cell lines by targeting p27Kip1. *J. Biol. Chem.* 282(32):23716-23724.
12. Formosa A, et al. (2014) MicroRNAs, miR-154, miR-299-5p, miR-376a, miR-376c, miR-377, miR-381, miR-487b, miR-485-3p, miR-495 and miR-654-3p, mapped to the 14q32.31 locus, regulate proliferation, apoptosis, migration and invasion in metastatic prostate cancer cells. *Oncogene* 33(44):5173-5182.
13. Qu Y, et al. (2014) miR-199a-3p inhibits aurora kinase A and attenuates prostate cancer growth: new avenue for prostate cancer treatment. *Am. J. Pathol.* 184(5):1541-1549.
14. Formosa A, et al. (2013) DNA methylation silences miR-132 in prostate cancer. *Oncogene* 32(1):127-134.
15. Tong AW, et al. (2009) MicroRNA profile analysis of human prostate cancers. *Cancer Gene Ther.* 16(3):206-216.

16. Boll K, *et al.* (2013) MiR-130a, miR-203 and miR-205 jointly repress key oncogenic pathways and are downregulated in prostate carcinoma. *Oncogene* 32(3):277-285.
17. Nguyen HC, *et al.* (2013) Expression differences of circulating microRNAs in metastatic castration resistant prostate cancer and low-risk, localized prostate cancer. *Prostate* 73(4):346-354.
18. Goto Y, *et al.* (2014) The microRNA-23b/27b/24-1 cluster is a disease progression marker and tumor suppressor in prostate cancer. *Oncotarget* 5(17):7748-7759.
19. Shi XB, *et al.* (2013) Tumor suppressive miR-124 targets androgen receptor and inhibits proliferation of prostate cancer cells. *Oncogene* 32(35):4130-4138.
20. Leite KR, *et al.* (2013) MicroRNA expression profiles in the progression of prostate cancer--from high-grade prostate intraepithelial neoplasia to metastasis. *Urol. Oncol.* 31(6):796-801.
21. Kojima S, *et al.* (2012) Tumour suppressors miR-1 and miR-133a target the oncogenic function of purine nucleoside phosphorylase (PNP) in prostate cancer. *Br. J. Cancer* 106(2):405-413.
22. Sun D, *et al.* (2011) miR-99 family of MicroRNAs suppresses the expression of prostate-specific antigen and prostate cancer cell proliferation. *Cancer Res.* 71(4):1313-1324.
23. Nishikawa R, *et al.* (2014) Tumor-suppressive microRNA-29s inhibit cancer cell migration and invasion via targeting LAMC1 in prostate cancer. *Int. J. Oncol.* 45(1):401-410.
24. Casanova-Salas I, *et al.* (2014) Identification of miR-187 and miR-182 as biomarkers of early diagnosis and prognosis in patients with prostate cancer treated with radical prostatectomy. *J. Urol.* 192(1):252-259.



**Table S5. Metabolomic signature in Zn-deficient young-adult rat prostate**

| Metabolites                     | Median fold-change (Zn-deficient vs sufficient) | <i>P</i> value | Biological process         |
|---------------------------------|-------------------------------------------------|----------------|----------------------------|
| <b>Downregulated</b><br>(n = 2) |                                                 |                |                            |
| Pipecolinic acid                | -1.79                                           | 0.0230         | ---                        |
| Adenine                         | -1.69                                           | 0.0241         | Purine metabolism          |
| <b>Upregulated</b><br>(n = 3)   |                                                 |                |                            |
| 3,6-Anhydro-D-galactose         | 2.27                                            | 0.0000         | ---                        |
| Myo-inositol                    | 1.61                                            | 0.0047         | Galactose/lipid metabolism |
| *Uracil                         | 1.47                                            | 0.0178         | Pyrimidine metabolism      |

Untargeted metabolomic profiling was by gas chromatography time-of-flight mass spectrometry (n = 8 rats/group). Five significantly dysregulated metabolites ( $P < 0.05$ ) were identified in lateral prostates of Zn-deficient vs sufficient young-adult rat (2.5-mo-old)(Sprague-Dawley strain).

\*Uracil is similarly upregulated in human prostate cancer.

Table S6. Compound\_ChemRICH in Zn-deficient vs Zn-sufficient middle-aged rat prostates (Wistar-Unilever strain)

| Compound.Name           | InChiKeys                    | Pubchem.ID | SMILES                           | pvalue | foldchange | CID     | ClusterNumber | xlogp  | ClusterLabel            | TreeLabel: FDR |
|-------------------------|------------------------------|------------|----------------------------------|--------|------------|---------|---------------|--------|-------------------------|----------------|
| xylose                  | SRBFZHDQGSBBOR-IOVATXLUSA-N  | 135191     | C1[C@H]([C@@H]([C@H](C(O)O)O)O)O | 0.16   | 1.2        | 135191  | 11            | -1.454 | Pentoses                | a 1            |
| xylonolactone NIST      | XXBSUZSONOQQGK-FLRLBIABSA-N  | 439692     | C1[C@H]([C@@H]([C@H](C(=O)O1)C   | 1      | 1.2        | 439692  | 16            | -0.96  | Dicarboxylic Acids      | 1              |
| xylitol                 | HEBKCHPVOIAQTA-NGQZQWQHPSA-N | 6912       | C([C@H]([C@H](CO)O)O)O           | 0.73   | 0.95       | 6912    | 3             | -3.224 | Sugar Alcohols          | 1              |
| xanthine                | LRFVITYWQMYALW-UHFFFAOYSA-N  | 1188       | C1=NC2=C(N1)C(=O)NC(=O)N2        | 0.16   | 1.1        | 1188    | 7             | -0.654 | Purinones               | 1              |
| valine                  | KZSNJWFQEVHDMF-BYPYUCNSA-N   | 6287       | CC(C)[C@@H](C(=O)O)N             | 0.094  | 1.4        | 6287    | 15            | -2.169 | Amino Acids, Branched-C | 1              |
| uridine                 | DRTQHJPMVMBUCF-XVFCMESISA-N  | 6029       | C1=CN(C(=O)NC1=O)[C@H]2[C@H      | 0.86   | 0.84       | 6029    | 9             | -2.117 | Pyrimidine Nucleosides  | 1              |
| uric acid               | LEHOTFFKMEONL-UHFFFAOYSA-N   | 1175       | C12=C(NC(=O)N1)NC(=O)NC2=O       | 0.55   | 0.85       | 1175    | 7             | -1.191 | Purinones               | 1              |
| urea                    | XSQKJJFZCRKT-UHFFFAOYSA-N    | 1176       | C(=O)(N)N                        | 0.16   | 0.65       | 1176    | 35            | -1.686 | Organic Chemicals       | 1              |
| uracil                  | ISAKRJGDUQUOIC-UHFFFAOYSA-N  | 1174       | C1=CNC(=O)NC1=O                  | 0.04   | 1.2        | 1174    | 7             | -0.875 | Pyrimidinones           | 1              |
| UDP-N-acetylglucosamine | LFTYTUAZOPRMMI-CFRASDGPASA-N | 445675     | CC(=O)N[C@@H]1[C@@H]([C@@H]([C   | 0.6    | 0.83       | 445675  | 9             | -5.903 | Uridine Diphosphate Sug | 1              |
| tyrosine                | OUYCCASQSFE-MQMMMGPOBSA-N    | 6057       | C1=CC(=CC=C1C[C@@H](C(=O)O)N)    | 0.0078 | 1.6        | 6057    | 28            | -2.711 | Amino Acids, Aromatic   | 1              |
| tryptophan              | QIVBCDIJAI PQS-VIFPVBCQESA-N | 6305       | C1=CC=C2C(=C1)C(=CN2)C[C@@H](C   | 1      | 1          | 6305    | 10            | -2.023 | Amino Acids, Aromatic   | 1              |
| tocopherol alpha-       | NCYCYZNXIZOKI-OVSJKPMPASA-N  | 638015     | CC1=C(C(CCC1)(C)C)/C=C/C(=C/C/C/ | 0.34   | 0.8        | 638015  | 49            | 6.335  | Retinoids               | 1              |
| thymidine               | IQFYKMMVGFJEH-XLPZGREQSA-N   | 5789       | CC1=CN(C(=O)NC1=O)[C@H]2[C@H     | 0.44   | 1.1        | 5789    | 9             | -1.335 | Pyrimidine Nucleosides  | 1              |
| threonine               | AYFVYJQAPQTC-CGBXJSLDSA-N    | 6288       | C[C@H]([C@@H](C(=O)O)N)O         | 0.93   | 1.1        | 6288    | 27            | -3.496 | Amino Acids             | 1              |
| terephthalic acid       | KKEYFWRCBNT PAC-UHFFFAOYSA-N | 7489       | C1=CC(=CC=C1C(=O)O)C(=O)O        | 0.63   | 1.1        | 7489    | 8             | -0.118 | Phthalic Acids          | 1              |
| taurine                 | XOAAWQZATWQOTB-UHFFFAOYSA-N  | 1123       | C(CS(=O)(=O)O)N                  | 0.93   | 0.7        | 1123    | 34            | -1.678 | Alkanesulfonic Acids    | 1              |
| succinic acid           | KDYFGRWQOYBRFD-UHFFFAOYSA-N  | 1110       | C(C(=O)O)C(=O)O                  | 0.39   | 0.85       | 1110    | 29            | -0.71  | Dicarboxylic Acids      | 1              |
| stearic acid            | QIQXTHQIDYTRFH-UHFFFAOYSA-N  | 5281       | CCCCCCCCCCCCCCCC(=O)O            | 0.22   | 1.2        | 5281    | 1             | 8.708  | Saturated FA            | b 1            |
| squalene                | YYGNTYWPWHGJRM-AAJYLU CBSA-N | 638072     | CC(=CCC/C(=C)CC/C(=C)CC/C=C/CC/  | 0.04   | 0.66       | 638072  | 49            | 11.482 | Polyenes                | 1              |
| spermine                | PFNFQXMRSDOHW-UHFFFAOYSA-N   | 1103       | C(CNCCCN)CNCCCN                  | 0.8    | 1.1        | 1103    | 33            | -0.682 | Spermidine              | 1              |
| sorbitol                | FBPFTZCFMRRESA-JGWLITMVSA-N  | 5780       | C([C@H]([C@H]([C@@H]([C@H]([C@H] | 0.44   | 1.4        | 5780    | 21            | -3.896 | Sugar Alcohols          | 1              |
| serine                  | MTCFGRXMLQNBG-REOHLBHASA-N   | 5951       | C([C@@H](C(=O)O)N)O              | 0.86   | 1.1        | 5951    | 27            | -3.956 | Amino Acids             | 1              |
| salicylaldehyde         | SMQUZDBALVYZAC-UHFFFAOYSA-N  | 6998       | C1=CC=C(C=C1)C=O                 | 0.011  | 1.9        | 6998    | 8             | 0.989  | Aldehydes               | 1              |
| ribulose-5-phosphate    | FNZLKVNUWIHPS-UHNVVZDZSA-N   | 439184     | C([C@H]([C@H](C(=O)O)O)OP(=C     | 0.14   | 1.2        | 439184  | 14            | -4.396 | Ribulosephosphates      | 1              |
| ribose-5-phosphate      | KTPVXOYAKDPRHY-SOOFDHNKSA-N  | 439167     | C([C@@H]1[C@H]([C@H](C(O)O)O)O   | 0.22   | 1.4        | 439167  | 22            | -3.112 | Hexosephosphates        | 1              |
| ribose                  | HMFHBZSHGGEWLO-SOOFDHNKSA-N  | 5779       | C([C@@H]1[C@H]([C@H](C(O)O)O)O   | 0.019  | 1.5        | 5779    | 42            | -1.454 | Pentoses                | 1              |
| ribonic acid            | QXKAIJAYHKRRA-BXZVTAOSA-N    | 5460677    | C([C@H]([C@H]([C@H](C(=O)O)O)O)O | 0.39   | 1.4        | 5460677 | 16            | -3.067 | Dicarboxylic Acids      | 1              |
| ribitol                 | HEBKCHPVOIAQTA-ZXFHETKHASA-N | 827        | C(C(C(C(CO)O)O)O)O               | 0.67   | 0.56       | 827     | 3             | -3.224 | Sugar Alcohols          | 1              |
| pyruvic acid            | LCTONWCANYUPLM-UHFFFAOYSA-N  | 1060       | CC(=O)C(=O)O                     | 1      | 1.1        | 1060    | 18            | -0.426 | Pyruvates               | 1              |
| pyrophosphate           | XPPKVPWQALFU-UHFFFAOYSA-N    | 1023       | OP(=O)(O)OP(=O)(O)O              | 0.077  | 0.61       | 1023    | 26            | -3.476 | Diphosphonates          | 1              |
| putrescine              | KIDHWZJUCRJVML-UHFFFAOYSA-N  | 1045       | C(CCN)CN                         | 0.11   | 0.44       | 1045    | 33            | -0.626 | Biogenic Polyamines     | 1              |
| p-tolyl glucuronide     | JPAUCQAJHLSMQW-XPORZQOISA-N  | 154035     | CC1=CC=C(C=C1)O[C@H]2[C@@H]([    | 0.39   | 0.61       | 154035  | 19            | 0.189  | Phenols                 | 1              |
| pseudo uridine          | PTJWJQPHWPNBW-GBNDHIKLSA-N   | 15047      | C1=C(C(=O)NC(=O)N1)[C@H]2[C@@    | 0.22   | 0.63       | 15047   | 9             | -2.477 | Pyrimidine Nucleosides  | 1              |
| propane-1,3-diol NIST   | YPFDHNVDELHUC-UHFFFAOYSA-N   | 10442      | C(CO)CO                          | 0.44   | 1.4        | 10442   | 30            | -0.85  | Propylene Glycols       | 1              |
| pimelic acid            | WLJVNTCWHIRURA-UHFFFAOYSA-N  | 385        | C(CCC(=O)O)CCC(=O)O              | 0.44   | 0.83       | 385     | 1             | 0.575  | Dicarboxylic Acids      | b 1            |
| phosphoethanolamine     | SUH00TKUPISOBE-UHFFFAOYSA-N  | 1015       | C(COP(=O)(O)O)N                  | 0.44   | 0.79       | 1015    | 34            | -2.504 | Ethanolamines           | 1              |
| phosphate               | NBIIXVUZAF LBC-UHFFFAOYSA-N  | 1004       | OP(=O)(O)O                       | 0.49   | 0.79       | 1004    | 26            | -2.247 | Polymers                | 1              |
| phenylalanine           | COLNVLDHVWLRIT-QMMMGPBSA-N   | 6140       | C1=CC=C(C=C1)C[C@@H](C(=O)O)N    | 0.3    | 1.1        | 6140    | 28            | -1.575 | Amino Acids, Aromatic   | 1              |
| phenaceturic acid       | UTYVDVLMYQPLQB-UHFFFAOYSA-N  | 68144      | C1=CC=C(C=C1)CC(=O)NCC(=O)O      | 0.86   | 0.83       | 68144   | 28            | 0.425  | Dipeptides              | 1              |
| pentadecanoic acid      | WQEP L UGLDZJY-UHFFFAOYSA-N  | 13849      | CCCCCCCCCCCCCCC(=O)O             | 0.49   | 1.3        | 13849   | 1             | 7.001  | Saturated FA            | b 1            |
| pelargonic acid         | FBUKVVPVMBHYJY-UHFFFAOYSA-N  | 8158       | CCCCCCCC(=O)O                    | 0.14   | 1.3        | 8158    | 1             | 3.587  | Saturated FA            | b 1            |
| parabanic acid NIST     | ZFLIKDUSDBGUC-UHFFFAOYSA-N   | 67126      | C1(=O)C(=O)NC(=O)N1              | 1      | 0.97       | 67126   | 48            | -0.58  | Hydantoins              | 1              |
| pantothenic acid        | GHOKWGTUZEAEQD-ZETCQMYHSA-N  | 6613       | CC(C)(CO)[C@H](C(=O)NCCC(=O)O)O  | 0.093  | 0.58       | 6613    | 47            | -1.343 | beta-Alanine            | 1              |
| palmitoleic acid        | SECPZKBENQXJG-FPLPWBNLASA-N  | 445638     | CCCCC/C=C\CCCCCCCC(=O)O          | 0.66   | 1.6        | 445638  | 12            | 7.054  | UnSaturated FA          | 1              |
| palmitic acid           | IPCSVZSSVZVIGE-UHFFFAOYSA-N  | 985        | CCCCCCCCCCCCCCCC(=O)O            | 0.19   | 1.1        | 985     | 1             | 7.57   | Saturated FA            | b 1            |
| palatinitol             | SERLAGPUMNYUCK-DCUALPFSSA-N  | 88735      | C([C@@H]1[C@H]([C@@H]([C@@H]([   | 0.86   | 0.97       | 88735   | 5             | -5.004 | Disaccharides           | 1              |
| oxoproline              | ODHCTKXNWHHXC-VKHMVHEASA-N   | 7405       | C1CC(=O)N[C@@H]1C(=O)O           | 0.6    | 1.2        | 7405    | 46            | -0.827 | Pyrrrolidinones         | 1              |
| oxalic acid             | MUBZPKHOEPUJKR-UHFFFAOYSA-N  | 971        | C(=O)(C=O)O                      | 0.8    | 1.2        | 971     | 18            | -0.688 | Dicarboxylic Acids      | 1              |
| ornithine               | AHLPHDHMVZTML-BYPYUCNSA-N    | 6262       | C(C[C@@H](C(=O)O)N)CN            | 0.16   | 1.4        | 6262    | 17            | -3.307 | Amino Acids, Basic      | 1              |
| oleic acid              | ZQPPMHVWECSIRJ-KTKRTIGZSA-N  | 445639     | CCCCCCCC=C\CCCCCCCC(=O)O         | 0.34   | 1.2        | 445639  | 12            | 8.192  | UnSaturated FA          | 1              |
| oleamide NIST           | FATBGEAMYMYZAF-KTKRTIGZSA-N  | 5283387    | CCCCCCC/C=C\CCCCCCC(=O)N         | 1      | 1.1        | 5283387 | 50            | 7.464  | Oleic Acids             | 1              |
| octanol NIST            | KBFLHHGFOOTCA-UHFFFAOYSA-N   | 957        | CCCCCCCCO                        | 0.86   | 0.74       | 957     | 36            | 3.127  | Fatty Alcohols          | 1              |
| octadecanol             | GLDOVTGHNKAZLK-UHFFFAOYSA-N  | 8221       | CCCCCCCCCCCCCCCCCO               | 0.8    | 1          | 8221    | 37            | 8.817  | Fatty Alcohols          | 1              |
| noradrenaline           | SFLSHLFXELFNJZ-QMMMGPBSA-N   | 439260     | C1=CC(=C(C=C1[C@H](CN)O)O)O      | 0.55   | 1.2        | 439260  | 19            | -0.446 | Catecholamines          | 1              |
| nicotinamide            | DFPAKSUCGFBDF-UHFFFAOYSA-N   | 936        | C1=CC(=CN=C1)C(=O)N              | 0.44   | 0.76       | 936     | 10            | -1.236 | Nicotinic Acids         | 1              |
| n-acetyl-d-hexosamine   | OVRNDRQMDRJT HS-FMDGEEDCSA-N | 24139      | CC(=O)N[C@@H]1[C@H]([C@@H]([C    | 0.16   | 0.82       | 24139   | 47            | -1.488 | Glucosamine             | 1              |

| Compound.Name            | InChiKeys                    | Pubchem.ID | SMILES                                       | pvalue | foldchange | CID      | ClusterNumber | xlogp  | ClusterLabel            | TreeLabel: FDR |
|--------------------------|------------------------------|------------|----------------------------------------------|--------|------------|----------|---------------|--------|-------------------------|----------------|
| N-acetylaspartic acid    | OTCCIMWXFLJLIA-BYPYZUCNSA-N  | 65065      | CC(=O)N[C@@H](CC(=O)O)C(=O)O                 | 0.49   | 1.1        | 65065    | 31            | -1.265 | Amino Acids, Acidic     | 1              |
| myristic acid            | TUNFSRHWTWDNC-UHFFFAOYSA-N   | 11005      | CCCCCCCCCCCC(=O)O                            | 1      | 1.1        | 11005    | 1             | 6.432  | Saturated FA            | b 1            |
| methylmalonic acid       | ZIYVHBGGAAOTLY-UHFFFAOYSA-N  | 487        | CC(C(=O)O)C(=O)O                             | 0.11   | 1.2        | 487      | 29            | -0.085 | Dicarboxylic Acids      | 1              |
| methionine sulfoxide     | QEFRNWVLZKMPFJ-YGVKFDHGSA-N  | 158980     | CS(=O)CC[C@@H](C(=O)O)N                      | 0.55   | 1          | 158980   | 25            | -3.882 | Amino Acids, Sulfur     | 1              |
| methionine               | FFEARJCKVFRZR-BYPYZUCNSA-N   | 6137       | CSCC[C@@H](C(=O)O)N                          | 0.16   | 1.5        | 6137     | 25            | -1.853 | Amino Acids, Sulfur     | 1              |
| methanolphosphate        | CAALPUQFIOTL-UHFFFAOYSA-N    | 13130      | COP(=O)O                                     | 1      | 1.1        | 13130    | 26            | -1.728 | Organophosphates        | 1              |
| mannose                  | WQZGKKKJFFOK-QTVWNMPRSA-N    | 18950      | C([C@@H]1[C@H]([C@@H]([C@H]1O)O)O)O          | 0.16   | 0.4        | 18950    | 4             | -1.697 | Hexoses                 | 1              |
| mannitol                 | FBPFTZCFMRRESA-KVTDHHDQSA-N  | 6251       | C([C@H]([C@H]([C@H]([C@H]1O)O)O)O)O          | 0.39   | 0.74       | 6251     | 21            | -3.896 | Sugar Alcohols          | 1              |
| maltotriose              | FYGDMLNLYKFZSV-DZOUCCMHSA-N  | 439586     | C([C@@H]1[C@H]([C@@H]([C@H]1O)O)O)O          | 0.96   | 1          | 439586   | 5             | -5.629 | Trisaccharides          | 1              |
| maltose                  | GUBGYTABKSRVRQ-PICCSMPSSA-N  | 439186     | C([C@@H]1[C@H]([C@@H]([C@H]1O)O)O)O          | 0.019  | 0.73       | 439186   | 5             | -3.663 | Disaccharides           | 1              |
| malic acid               | BJEPYKPYRNKOW-UHFFFAOYSA-N   | 525        | C(C(C(=O)O)O)C(=O)O                          | 0.8    | 1.1        | 525      | 2             | -1.474 | Dicarboxylic Acids      | 1              |
| lyxose                   | SRBFZHDQGSBBOR-AGQMPKLSLA-N  | 439240     | C1[C@H]([C@@H]([C@@H]([C@H]1O)O)O)O          | 1      | 1          | 439240   | 11            | -1.454 | Pentoses                | a 1            |
| lyxitol                  | HEBKCHPVOIAQTA-IMJISDKUSA-N  | 439255     | C([C@@H]([C@@H]([C@@H]([C@@H]1O)O)O)O)O      | 0.6    | 0.47       | 439255   | 3             | -3.224 | Sugar Alcohols          | 1              |
| lysine                   | KDXKERNBSIXSRK-YFKPBYRVSA-N  | 5962       | C(CCN)C[C@@H](C(=O)O)N                       | 0.14   | 1.6        | 5962     | 17            | -2.949 | Amino Acids, Basic      | 1              |
| linoleic acid            | OYHQOLUKZRVRURQ-HZJYTRNSA-N  | 5280450    | CCCC/C=C/C/C=C\CCCCCCC(=O)O                  | 0.86   | 1.1        | 5280450  | 12            | 7.865  | UnSaturated FA          | 1              |
| lignoceric acid          | QZZGJVDVWLFDXLK-UHFFFAOYSA-N | 11197      | CCCCCCCCCCCCCCCCCCCC(=O)O                    | 0.22   | 1.2        | 11197    | 1             | 12.122 | Saturated FA            | b 1            |
| levoglucosan             | TWNIBLMWSKIRAT-VFUOHLCSA-N   | 2724705    | C1[C@@H]2[C@H]([C@@H]([C@H]1O)O)O2           | 0.44   | 0.94       | 2724705  | 39            | -1.537 | Hexoses                 | 1              |
| leucine                  | ROHFNLRQFUQHCH-YFKPBYRVSA-N  | 6106       | CC(C)C[C@@H](C(=O)O)N                        | 0.34   | 1.3        | 6106     | 40            | -1.389 | Amino Acids, Branched-C | 1              |
| lauric acid              | POULHZVOKOAJMA-UHFFFAOYSA-N  | 3893       | CCCCCCCCCCCC(=O)O                            | 0.024  | 1.3        | 3893     | 1             | 5.294  | Saturated FA            | b 1            |
| lactulose                | JCQLYHFGKRNPE-FCVZTGTOSA-N   | 11333      | C([C@@H]1[C@H]([C@@H]([C@H]1O)O)O)O          | 0.19   | 0.88       | 11333    | 39            | -3.706 | Disaccharides           | 1              |
| lactic acid              | JVTAAEKCFNVCJ-UHFFFAOYSA-N   | 612        | CC(C(=O)O)O                                  | 0.86   | 0.98       | 612      | 18            | -0.591 | Lactates                | 1              |
| isothreonic acid         | JPIQOTBSSVTP-GBXJSLDSA-N     | 151152     | C([C@@H]([C@@H]([C@@H]([C@@H]1O)O)O)O)O      | 0.3    | 0.84       | 151152   | 2             | -2.395 | Butyrates               | 1              |
| isothreitol              | UNXHWFMMPAWPVI-QVWZVWQMSA-N  | 169019     | C([C@H]([C@@H]([C@@H]([C@@H]1O)O)O)O)O       | 0.26   | 1.2        | 169019   | 3             | -2.552 | Sugar Alcohols          | 1              |
| isoribose                | SRBFZHDQGSBBOR-SOOFDHNKSA-N  | 10975657   | C1[C@H]([C@@H]([C@@H]([C@@H]1O)O)O)O         | 0.14   | 1.3        | 10975657 | 11            | -1.454 | Pentoses                | a 1            |
| isoleucine               | AGPKZVTJJNIPAG-WHFBIKZSA-N   | 6306       | CC[C@H](C)[C@@H](C(=O)O)N                    | 0.077  | 1.3        | 6306     | 40            | -1.6   | Amino Acids, Branched-C | 1              |
| isocitric acid           | ODBLHEXUDAPZAU-ZAFYKAAXSA-N  | 5318532    | C([C@@H]([C@@H]([C@@H]([C@@H]1O)O)O)O)O      | 0.0012 | 0.22       | 5318532  | 43            | -2.064 | Tricarboxylic Acids     | 0.21           |
| inositol-4-monophosphate | INAPMGSXUVUWAF-GFWFORPUSA-N  | 440043     | [C@H]1([C@@H]([C@@H]([C@@H]([C@@H]1O)O)O)O)O | 0.014  | 1.4        | 440043   | 23            | -3.545 | Inositol Phosphates     | 1              |
| inosine 5'-monophosphate | GRSZFWQUAKGDAV-KQYNXXCUSA-N  | 8582       | C1=NC(=O)C2=C(N1)N(C=N2)[C@H]3               | 1      | 0.82       | 8582     | 6             | -2.291 | Purine Nucleosides      | 1              |
| inosine                  | UGQMVRVMYASFK-QKYNXXCUSA-N   | 6021       | C1=NC(=O)C2=C(N1)N(C=N2)[C@H]3               | 0.024  | 0.68       | 6021     | 6             | -0.633 | Purine Nucleosides      | 1              |
| indoxyl sulfate          | BXFFHSIDQOFMLE-UHFFFAOYSA-N  | 10258      | C1=CC=C2C(=C1)C(=CN2)OS(=O)(=O)O             | 0.3    | 0.74       | 10258    | 10            | -0.075 | Indoles                 | 1              |
| hypoxanthine             | FDGQSTZJBFJUBT-UHFFFAOYSA-N  | 790        | C1=NC2=C(N1)C(=O)N=CN2                       | 0.19   | 1.2        | 790      | 7             | 0.556  | Purinones               | 1              |
| hydroxylamine            | AVXURJPOCDRRFD-UHFFFAOYSA-N  | 787        | NO                                           | 0.39   | 1.5        | 787      | 35            | -1.604 |                         | 1              |
| hydroxycarbamate NIST    | DRAJWRKLRBNJRQ-UHFFFAOYSA-M  | 16639161   | C(=O)NO                                      | 0.26   | 0.86       | 16639161 | 35            | -0.878 |                         | 1              |
| histidine                | HNDVDQJICGZPNO-YFKPBYRVSA-N  | 6274       | C1=C(NC(=N1)C[C@@H](C(=O)O)N)N               | 0.077  | 1.9        | 6274     | 6             | -3.429 | Amino Acids, Cyclic     | 1              |
| hexose-6-phosphate       | NBSCHQZLSJFNQ-UHFFFAOYSA-N   | 208        | C(C1C(C(C(C(O1)O)O)O)O)OP(=O)(O)O            | 0.67   | 1.3        | 208      | 13            | -3.355 | Hexosephosphates        | 1              |
| hexitol                  | FBPFTZCFMRRESA-UHFFFAOYSA-N  | 453        | C(C(C(C(C(CO)O)O)O)O)O                       | 0.22   | 0.71       | 453      | 21            | -3.896 | Sugar Alcohols          | 1              |
| heptadecanoic acid       | KEMQGRYUADPNZ-UHFFFAOYSA-N   | 10465      | CCCCCCCCCCCCCCCC(=O)O                        | 0.26   | 1.3        | 10465    | 1             | 8.139  | Saturated FA            | b 1            |
| guanosine                | NYHBQMYGNKIUIF-UUOKFMHZA-N   | 6802       | C1=NC2=C(N1[C@H]3[C@@H]([C@@H]3O)O)N         | 0.019  | 0.49       | 6802     | 6             | -0.958 | Purine Nucleosides      | 1              |
| glycolic acid            | AEMRFAOFKBGASW-UHFFFAOYSA-N  | 757        | C(C(=O)O)O                                   | 0.35   | 1.5        | 757      | 18            | -1.117 | Glycolates              | 1              |
| glycocyanine             | BPMFZUMJYQTVII-UHFFFAOYSA-N  | 763        | C(C(=O)O)N=C(N)N                             | 0.44   | 1.2        | 763      | 32            | -3.974 |                         | 1              |
| glycine                  | DHMQDGOQFOQNFH-UHFFFAOYSA-N  | 750        | C(C(=O)O)N                                   | 0.11   | 0.71       | 750      | 32            | -3.35  | Amino Acids             | 1              |
| glycerol-alpha-phosphate | AWUCVROLDVIAJ-UHFFFAOYSA-N   | 754        | C(COP(=O)(O)O)O                              | 0.019  | 0.48       | 754      | 14            | -3.109 | Glycerophosphates       | 1              |
| glycerol                 | PEDCQBHIVMGVHV-UHFFFAOYSA-N  | 753        | C(C(CO)O)O                                   | 0.26   | 0.68       | 753      | 30            | -1.88  | Sugar Alcohols          | 1              |
| glyceric acid            | RBNPOMFGQQGHHO-UWTATZPHSA-N  | 439194     | C([C@H](C(=O)O)O)O                           | 0.094  | 2.2        | 439194   | 2             | -1.723 | Sugar Acids             | 1              |
| glutamine                | ZDXPYRPNDDTMRX-VKHMHEASA-N   | 5961       | C(CC(=O)N)[C@@H](C(=O)O)N                    | 0.44   | 1.3        | 5961     | 17            | -4.077 | Amino Acids, Basic      | 1              |
| glutamic acid            | WHUUTDBJXRKMK-VKHMHEASA-N    | 33032      | CC(C(=O)O)[C@@H](C(=O)O)N                    | 0.86   | 0.99       | 33032    | 17            | -3.349 | Amino Acids, Acidic     | 1              |
| glucose-6-phosphate      | NBSCHQZLSJFNQ-GASJEMHNSA-N   | 5958       | C([C@@H]1[C@H]([C@@H]([C@H]1O)O)O)O          | 0.73   | 1.3        | 5958     | 13            | -3.355 | Hexosephosphates        | 1              |
| glucose-1-phosphate      | HXXFSRBOHSIMQ-VFUOHLCSA-N    | 65533      | C([C@@H]1[C@H]([C@@H]([C@H]1O)O)O)O          | 0.0012 | 0.55       | 65533    | 13            | -3.355 | Hexosephosphates        | 0.21           |
| glucose                  | WQZGKKKJFFOK-VFUOHLCSA-N     | 64689      | C([C@@H]1[C@H]([C@@H]([C@H]1O)O)O)O          | 0.34   | 0.9        | 64689    | 4             | -1.697 | Hexoses                 | 1              |
| gluconic acid            | RGHNJXEOKUKBD-QTDBOELSSA-N   | 6857417    | C([C@@H]([C@@H]([C@@H]([C@@H]1O)O)O)O)O      | 0.89   | 0.96       | 6857417  | 16            | -3.739 | Sugar Acids             | 1              |
| galacturonic acid        | AEMOLEFTQBMLNQ-DTEWJGMSA-N   | 441476     | [C@@H]1([C@@H]([C@@H]([C@@H]1O)O)O)O         | 0.19   | 0.52       | 441476   | 44            | -1.54  | Hexuronic Acids         | 1              |
| galactose-6-phosphate    | NBSCHQZLSJFNQ-SVZMEIOVSA-N   | 439404     | C([C@@H]1[C@H]([C@@H]([C@H]1O)O)O)O          | 0.48   | 1.4        | 439404   | 13            | -3.355 | Hexosephosphates        | 1              |
| galactose                | WQZGKKKJFFOK-PHYPRBDBSA-N    | 439357     | C([C@@H]1[C@H]([C@@H]([C@H]1O)O)O)O          | 0.8    | 1.1        | 439357   | 4             | -1.697 | Hexoses                 | 1              |
| galactinol               | VCWWRQDBPZXKXG-ZNVDFQESA-N   | 11727586   | C([C@@H]1[C@H]([C@@H]([C@H]1O)O)O)O          | 0.3    | 1.2        | 11727586 | 5             | -3.424 | Disaccharides           | 1              |
| fumaric acid             | VZCYOQTPCHFL-OWOJBTEDSA-N    | 444972     | C=C/C(=O)O\C(=O)O                            | 0.73   | 1.1        | 444972   | 20            | -0.416 | Dicarboxylic Acids      | 1              |
| fucose                   | SHZGJCMBGCMKK-FPRJBLGDSA-N   | 439650     | C([C@@H]1[C@H]([C@@H]([C@@H]1O)O)O)O         | 0.67   | 1          | 439650   | 4             | -0.994 | Hexoses                 | 1              |
| fructose-6-phosphate     | BGWGXPPYQGQALX-ARQDHWQXSA-N  | 440641     | C([C@@H]1[C@H]([C@@H]([C@@H]1O)O)O)O         | 0.49   | 1.6        | 440641   | 22            | -3.398 | Hexosephosphates        | 1              |
| fructose-1-phosphate     | RHKKZBWRNHGJZ-VRPWFDPXSA-N   | 439394     | C([C@@H]1[C@H]([C@@H]([C@@H]1O)O)O)O         | 0.0028 | 1.8        | 439394   | 22            | -3.398 | Hexosephosphates        | 0.47           |
| fructose                 | RFSUNEUAIZKAJO-ARQDHWQXSA-N  | 439709     | C([C@@H]1[C@H]([C@@H]([C@@H]1O)O)O)O         | 0.3    | 1.4        | 439709   | 42            | -1.74  | Hexoses                 | 1              |

| Compound.Name                   | InChiKeys                    | Pubchem.ID | SMILES                                                                  | pvalue  | foldchange | CID      | ClusterNumber | xlogp  | ClusterLabel         | TreeLabel:FDR |
|---------------------------------|------------------------------|------------|-------------------------------------------------------------------------|---------|------------|----------|---------------|--------|----------------------|---------------|
| ethanolamine                    | HZAXFHJVLSVMW-UHFFFAOYSA-N   | 700        | C(CO)N                                                                  | 0.6     | 0.95       | 700      | 34            | -1.275 | Ethanolamines        | 1             |
| erythronic acid lactone         | SGMJBNSHAZVGMC-PWNYCUMCSA-N  | 5325915    | C1[C@H]([C@H]([C@H](C=O)O1)O)O                                          | 0.35    | 0.97       | 5325915  | 2             | -0.717 | Butyrates            | 1             |
| epsilon-caprolactam             | JBKVHLHDHXXEQ-UHFFFAOYSA-N   | 7768       | C1CCC(=O)NCC1                                                           | 0.44    | 1.6        | 7768     | 50            | 0.404  | Lactams              | 1             |
| enolpyruvate NIST               | DTBNBXWJWCWKI-UHFFFAOYSA-N   | 1005       | C=C(C(=O)O)OP(=O)(O)O                                                   | 0.55    | 1.2        | 1005     | 20            | -1.296 | Hydroxy Acids        | 1             |
| dodecanol                       | LQZZUXJYWNFBMV-UHFFFAOYSA-N  | 8193       | CCCCCCCCCCCO                                                            | 0.094   | 1.8        | 8193     | 36            | 5.403  | Fatty Alcohols       | 1             |
| dihydroxyacetone                | RXKJFZQQPQGTFL-UHFFFAOYSA-N  | 670        | C(C(=O)O)O                                                              | 0.39    | 0.94       | 670      | 30            | -1.889 | Ketoses              | 1             |
| dihydrocholesterol              | QYIXCDOBOSTCEI-FBVYSKEZSA-N  | 66066      | C[C@H]([CCCC(C)C][C@H]1CC[C@@H]1O)O                                     | 0.51    | 1.3        | 66066    | 45            | 11.783 | Cholestanes          | c 1           |
| deoxycholic acid                | KXGVVGMKQFVNSR-LLQZFEFROSA-N | 222528     | C[C@H]([CCCC(C)C][C@H]1CC[C@@H]1O)O                                     | 0.34    | 0.68       | 222528   | 45            | 5.756  | Cholic Acids         | c 1           |
| dehydroascorbic acid            | SBJKFFYZUCET-JLAZNSOCSA-N    | 440667     | C([C@@H]([C@@H]1C(=O)C(=O)C(=O)O1)O)O                                   | 0.19    | 0.74       | 440667   | 44            | -1.878 | Sugar Acids          | 1             |
| dehydroabiatic acid             | NFWKVVVWBFBAOV-MISYRCLQSA-N  | 94391      | CC(C)C1=CC=C(C=C1)[C@H]3[C@@H](C)CC[C@H]3O                              | 0.86    | 1.2        | 94391    | 8             | 5.656  | Diterpenes, Abietane | 1             |
| cytidine-5-monophosphate        | IERHLVCPMICTF-XVFCMESISA-N   | 6131       | C1=CN(C(=O)N=C1N)[C@H]2[C@@H](NC(=O)N)C(=O)N2                           | 0.11    | 0.093      | 6131     | 9             | -3.851 | Cytosine Nucleotides | 1             |
| cysteine                        | XUJNEKLAYXESH-REOHLBHSA-N    | 5862       | C([C@@H]([C@@H](O)N)S)C(=O)O                                            | 0.077   | 2.4        | 5862     | 25            | -2.575 | Amino Acids, Sulfur  | 1             |
| cyclohexylamine                 | PAFZNLMFXTMII-UHFFFAOYSA-N   | 7965       | C1CCC(CC1)N                                                             | 0.14    | 1.6        | 7965     | 33            | 1.262  | Cycloparaffins       | 1             |
| creatinine                      | DDRJAANPRJIHG-UHFFFAOYSA-N   | 588        | CN1CC(=O)N=C1N                                                          | 0.6     | 0.67       | 588      | 48            | -0.126 | Imidazoles           | 1             |
| conduritol-beta-epoxide         | ZHMWVQGCZINIHW-SPHYCDKFSAN   | 9989541    | [C@H]1[C@@H]([C@H]2C[C@@H]1O)O2                                         | 0.064   | 1.7        | 9989541  | 23            | -1.727 | Cycloparaffins       | 1             |
| citrulline                      | RHGKLRLOHDJDR-BYPYUCNSA-N    | 9750       | C(C[C@@H](C(=O)O)N)CNC(=O)N                                             | 0.3     | 1.4        | 9750     | 46            | -3.909 | Amino Acids          | 1             |
| citric acid                     | KRKNYBCHXYNGOX-UHFFFAOYSA-N  | 311        | C(C(=O)O)(CC(=O)O)(C(=O)O)O                                             | 0.00029 | 0.099      | 311      | 43            | -2.247 | Tricarboxylic Acids  | 0.05          |
| cholesterol                     | HVVYWMOMLDIMFJA-DPAQBDFISA-N | 5997       | C[C@H]([CCCC(C)C][C@H]1CC[C@@H]1O)O                                     | 0.26    | 0.84       | 5997     | 38            | 10.518 | Cholestanes          | 1             |
| cellobiose                      | GUBGYTABKSRVRQ-QUYVBRFLSA-N  | 6255       | C([C@@H]1[C@H]([C@@H]([C@H]([C@@H](O1)O)O)O)O)O                         | 0.094   | 0.56       | 6255     | 5             | -3.663 | Disaccharides        | 1             |
| capric acid                     | GHNVFZFCNZKVT-UHFFFAOYSA-N   | 2969       | CCCCCCCCC(=O)O                                                          | 0.024   | 1.4        | 2969     | 1             | 4.156  | Saturated FA         | b 1           |
| beta-sitosterol                 | KJWDPNRRJALLNS-VJFFXLSFSA-N  | 222284     | CC[C@H]([CC]([C@@H]([C@H]1CC[C@@H]1O)O)O)O                              | 0.34    | 0.78       | 222284   | 38            | 11.959 | Cholestanes          | 1             |
| beta-glycerolphosphate          | DHCLVCXQBOPH-UHFFFAOYSA-N    | 2526       | C(C(=O)OP(=O)(O)O)O                                                     | 0.26    | 0.84       | 2526     | 14            | -3.109 | Glycerophosphates    | 1             |
| beta-alanine                    | UCMIRNVEIXFBKS-UHFFFAOYSA-N  | 239        | C(CN)C(=O)O                                                             | 0.73    | 1.2        | 239      | 41            | -1.026 | Amino Acids          | 1             |
| benzylalcohol                   | WVDDGKGMKODPV-UHFFFAOYSA-N   | 2879       | CC1=CC=C(C=C1)O                                                         | 0.16    | 1.5        | 2879     | 19            | 1.338  | Phenols              | 1             |
| benzoic acid                    | WPYMKLBDIGXBTP-UHFFFAOYSA-N  | 243        | C1=CC=C(C=C1)O=O                                                        | 0.44    | 1.7        | 243      | 8             | 0.982  | Benzoates            | 1             |
| aspartic acid                   | CKLJMWZTZICHS-REOHLBHSAN     | 5960       | C([C@@H]([C@@H]([C@@H](C(=O)O)N)C(=O)O)O)O                              | 0.077   | 1.4        | 5960     | 31            | -3.707 | Amino Acids, Acidic  | 1             |
| asparagine                      | DCXYFEDJODNFA-REOHLBHSAN     | 6267       | C([C@@H]([C@@H]([C@@H](C(=O)O)N)C(=O)O)O)O                              | 0.26    | 1.2        | 6267     | 31            | -4.435 | Amino Acids, Basic   | 1             |
| ascorbic acid                   | CIWBSSHKKDKBK-LJAZNSOCSAN    | 54670067   | C([C@@H]([C@@H]1C(C=C(C(=O)O1)O)O)O)O                                   | 0.34    | 0.43       | 54670067 | 20            | -0.178 | Sugar Acids          | 1             |
| arachidonic acid                | YZKBAPSDXZRG-DOFZRALISA-N    | 444899     | CCCCC/C=C/C/C=C/C/C=C/C/C=C/C/C=C/C/C=C/C/C=C/C                         | 0.26    | 1          | 444899   | 12            | 8.349  | Unsaturated FA       | 1             |
| arachidic acid                  | VKOBVWKNKXDXE-UHFFFAOYSA-N   | 10467      | CCCCCCCCCCCCCCCC(=O)O                                                   | 0.67    | 1.4        | 10467    | 1             | 9.846  | Saturated FA         | b 1           |
| arabitol                        | HEBKHPVOIAQTA-QWVZVWQMSA-N   | 94154      | C([C@H]([C@@H]([C@@H]([C@@H]([C@@H](O)O)O)O)O)O                         | 0.22    | 0.62       | 94154    | 3             | -3.224 | Sugar Alcohols       | 1             |
| arabinose                       | SRBFZHDQGSBBOR-ZRMNMSDTSAN   | 6902       | C1[C@H]([C@@H]([C@H]([C@@H](C1O)O)O)O)O                                 | 0.0078  | 1.6        | 6902     | 11            | -1.454 | Pentoses             | a 1           |
| aminomalonic acid               | JINBYESILADKFW-UHFFFAOYSA-N  | 100714     | C(C(=O)O)(C(=O)O)N                                                      | 0.063   | 0.36       | 100714   | 27            | -3.523 | Dicarboxylic Acids   | 1             |
| allantoic acid                  | NUCLJNSWZCHRKL-UHFFFAOYSA-N  | 203        | C(C(=O)O)(NC(=O)N)NC(=O)N                                               | 0.45    | 0.55       | 203      | 32            | -2.924 |                      | 1             |
| alanine                         | QNAVYBMKLOCPYG-REOHLBHSAN    | 5950       | C[C@H]([C@@H](O)N)C(=O)O                                                | 0.86    | 0.81       | 5950     | 15            | -2.824 | Amino Acids          | 1             |
| adenosine-5-monophosphate       | UDMBCSSLTHHNC-QKYNXXCUSA-N   | 6083       | C1=NC2=C(C(=N1)N)N=CN2[C@H]3[C@H]([C@@H]([C@@H]([C@@H]([C@@H]3O)O)O)O)O | 0.39    | 0.63       | 6083     | 24            | -4.025 | Purine Nucleosides   | 1             |
| adenosine                       | OIRDTQYFTABQQC-KQYNXXCUSA-N  | 60961      | C1=NC2=C(C(=N1)N)N=CN2[C@H]3[C@H]([C@@H]([C@@H]([C@@H]3O)O)O)O          | 0.44    | 0.88       | 60961    | 24            | -2.367 | Purine Nucleosides   | 1             |
| adenine                         | GFFGJXGJBIJGV-UHFFFAOYSA-N   | 190        | C1=NC2=C(N1)C(=NC=N2)N                                                  | 0.077   | 0.71       | 190      | 7             | -1.287 | Purines              | 1             |
| aconitic acid                   | GTZCVFVGUGFEME-IWQZHSRSA-N   | 643757     | C/C=C(C(=O)O)/C(=O)O                                                    | 0.00029 | 0.39       | 643757   | 20            | -1.034 | Tricarboxylic Acids  | 0.05          |
| acetophenone NIST               | KWOLFJPFCHCOG-UHFFFAOYSA-N   | 7410       | CC(=O)C1=CC=CC=C1                                                       | 0.44    | 1.3        | 7410     | 8             | 1.244  | Acetophenones        | 1             |
| 5-methoxytryptamine             | JTEJPPKMYBDEMY-UHFFFAOYSA-N  | 1833       | COC1=CC=C(C=C1)NC(=O)C2=CC=CC=C2                                        | 1       | 1.4        | 1833     | 10            | 0.687  | Serotonin            | 1             |
| 5-hydroxy-3-indoleacetic acid   | DUUGKQCCEGLZNO-UHFFFAOYSA-N  | 1826       | C1=CC2=C(C=C1O)C(=CN2)CC(=O)O                                           | 0.14    | 1.2        | 1826     | 10            | 0.513  | Indoleacetic Acids   | 1             |
| 5'-deoxy-5'-methylthioadenosine | WUUGFSXJNOTRMR-IOSLPCCCSA-N  | 439176     | CSC[C@H]1[C@H]([C@H]([C@@H]1O)O)O                                       | 0.55    | 0.87       | 439176   | 24            | -1.051 | Purine Nucleosides   | 1             |
| 4-hydroxybutyric acid           | SJZRECIVHDYJC-UHFFFAOYSA-N   | 10413      | C(CC(=O)O)O                                                             | 1       | 0.86       | 10413    | 29            | -0.601 | Butyrates            | 1             |
| 3-phosphoglycerate              | OSJPPGNTCRNQQC-UHFFFAOYSA-N  | 724        | C(C(C(=O)O)OP(=O)(O)O)O                                                 | 0.11    | 1.2        | 724      | 14            | -2.952 | Sugar Acids          | 1             |
| 3-hydroxybutyric acid           | WHBMMWSBFZVSSR-GSVOUGTGSAN   | 92135      | C[C@H]([C@@H](O)O)O                                                     | 0.73    | 0.87       | 92135    | 2             | -0.499 | Butyrates            | 1             |
| 3-aminoisobutyric acid          | QCHPKSFMDFHSPNR-UHFFFAOYSA-N | 64956      | CC(CN)C(=O)O                                                            | 0.73    | 0.74       | 64956    | 41            | -0.733 | Amino Acids          | 1             |
| 2-monopalmitin                  | BBNYCLAREVXOSG-UHFFFAOYSA-N  | 123409     | CCCCCCCCCCCC(=O)OC(CO)CO                                                | 0.39    | 0.64       | 123409   | 1             | 6.51   | Glycerides           | b 1           |
| 2-hydroxypyrazinyl-2-propeno    | WVZVBCSNPDDHI-FNORWQNLISA-N  | 5371086    | CCOC(=O)C(=O)/C=C/C1=NC=NC=N1                                           | 0.34    | 1.5        | 5371086  | 15            | 0.649  |                      | 1             |
| 2-hydroxyglutaric acid          | HWXBTVAVRSUOIR-UHFFFAOYSA-N  | 43         | C(CC(=O)O)C(C(=O)O)O                                                    | 0.12    | 1.6        | 43       | 16            | -1.116 | Dicarboxylic Acids   | 1             |
| 2-aminobutyric acid             | QWKQKZIFLGMDS-UHFFFAOYSA-N   | 6657       | CCC(C(=O)O)N                                                            | 0.22    | 1.4        | 6657     | 15            | -2.466 | Butyrates            | 1             |
| 2,3-dihydroxybutanoic acid NIST | LOUGYXZSURQALL-UHFFFAOYSA-N  | 250402     | CC(C(C(=O)O)O)O                                                         | 0.27    | 1.2        | 250402   | 2             | -1.263 | Sugar Acids          | 1             |
| 1-methylinosine                 | WJNGQIYELQJMN-IOSLPCCCSA-N   | 65095      | CN1C=NC2=C(C1=O)N=CN2[C@H]3[C@H]([C@@H]([C@@H]([C@@H]3O)O)O)O           | 0.6     | 0.86       | 65095    | 6             | -1.805 | Purine Nucleosides   | 1             |
| 1-hexadecanol                   | BXWNKGSJHAJOGX-UHFFFAOYSA-N  | 2682       | CCCCCCCCCCCCCCCCO                                                       | 0.55    | 0.85       | 2682     | 37            | 7.679  | Fatty Alcohols       | 1             |
| 1,5-anhydroglucitol             | MPCAJMNYNOGXPB-SLPGGIOYSA-N  | 64960      | C1[C@H]([C@H]([C@@H]([C@H]([C@H]1O)O)O)O)O                              | 0.31    | 0.6        | 64960    | 4             | -1.591 | Hexoses              | 1             |
| 1,2-anhydro-myoinositol NIST    | ZHMWVQGCZINIHW-FTYOSCRSSAN   | 119054     | C([C@H]1[C@@H]([C@H]([C@@H]([C@H]1O)O)O)O)O                             | 0.55    | 0.79       | 119054   | 23            | -1.727 | Cycloparaffins       | 1             |
| 1,2,4-benzenetriol              | GGNQRNBDZQJCCN-UHFFFAOYSA-N  | 10787      | C1=CC(=C(C=C1)O)O                                                       | 0.11    | 1.9        | 10787    | 19            | 1.002  | Phenols              | 1             |

**Table S7. Results of the ChemRICH enrichment analysis for the altered metabolites in Zn-deficient vs Zn-sufficient middle-aged rat prostates (Wistar-Unilever strain)**

| Cluster name               | Cluster size | p-values | FDR  | Key compound            | Altered metabolites | Increased | Decreased |
|----------------------------|--------------|----------|------|-------------------------|---------------------|-----------|-----------|
| Tricarboxylic Acids        | 3            | 0.0025   | 0.06 | citric acid             | 3                   | 0         | 3         |
| Pentoses                   | 5            | 0.0083   | 0.1  | arabinose               | 2                   | 2         | 0         |
| Saturated FA               | 10           | 0.02     | 0.16 | lauric acid             | 2                   | 2         | 0         |
| Hexosephosphates           | 7            | 0.27     | 1    | glucose-1-phosphate     | 2                   | 1         | 1         |
| Purine Nucleosides         | 7            | 0.33     | 1    | guanosine               | 2                   | 0         | 2         |
| Amino Acids                | 7            | 1        | 1    | glycine                 | 0                   | 0         | 0         |
| Amino Acids, Acidic        | 3            | 1        | 1    | aspartic acid           | 0                   | 0         | 0         |
| Amino Acids, Aromatic      | 3            | 1        | 1    | tyrosine                | 1                   | 1         | 0         |
| Amino Acids, Basic         | 4            | 1        | 1    | lysine                  | 0                   | 0         | 0         |
| Amino Acids, Branched-Chai | 3            | 1        | 1    | isoleucine              | 0                   | 0         | 0         |
| Amino Acids, Sulfur        | 3            | 1        | 1    | cysteine                | 0                   | 0         | 0         |
| Butyrates                  | 5            | 1        | 1    | 2-aminobutyric acid     | 0                   | 0         | 0         |
| Cholestanes                | 3            | 1        | 1    | cholesterol             | 0                   | 0         | 0         |
| Cycloparaffins             | 3            | 1        | 1    | conduritol-beta-epoxide | 0                   | 0         | 0         |
| Dicarboxylic Acids         | 10           | 1        | 1    | aminomalonnate          | 0                   | 0         | 0         |
| Disaccharides              | 5            | 1        | 1    | maltose                 | 1                   | 0         | 1         |
| Fatty Alcohols             | 4            | 1        | 1    | dodecanol               | 0                   | 0         | 0         |
| Hexoses                    | 7            | 1        | 1    | mannose                 | 0                   | 0         | 0         |
| Phenols                    | 3            | 1        | 1    | 1,2,4-benzenetriol      | 0                   | 0         | 0         |
| Purinones                  | 3            | 1        | 1    | xanthine                | 0                   | 0         | 0         |
| Pyrimidine Nucleosides     | 3            | 1        | 1    | pseudo uridine          | 0                   | 0         | 0         |
| Sugar Acids                | 6            | 1        | 1    | glyceric acid           | 0                   | 0         | 0         |
| Sugar Alcohols             | 9            | 1        | 1    | hexitol                 | 0                   | 0         | 0         |
| UnSaturated FA             | 4            | 1        | 1    | arachidonic acid        | 0                   | 0         | 0         |
